# Supplementary material
Source: PubMed Central journal article supplement (PMC10091225)
Supplement: NIHMS1883789-supplement-supinfo.pdf [file NIHMS1883789-supplement-supinfo.pdf]

# ntLink: a toolkit for *de novo* genome assembly scaffolding and mapping using long reads

Lauren Coombe, René L. Warren, Johnathan Wong, Vladimir Nikolic, Inanc Birol

## Supplementary Tables

**Supplementary Table 1. Accessions for the long-read datasets listed in Table 1.**

| Species                       | Fold coverage of long reads | Accession(s)                                                                                                                                |
|-------------------------------|-----------------------------|---------------------------------------------------------------------------------------------------------------------------------------------|
| <i>Caenorhabditis elegans</i> | 93                          | SRR10028109                                                                                                                                 |
| <i>Oryza sativa</i>           | 62                          | SRR10589512- SRR10589711                                                                                                                    |
| <i>Solanum lycopersicum</i>   | 72                          | ERR6668574 (Subsampled to ~72-fold)                                                                                                         |
| <i>Homo sapiens</i>           | 50                          | s3://ont-open-data/gm24385_2020.11/analysis/r9.4.1/20201026_1644_2-E5-H5_PAG07162_d7f262d5/guppy_v4.0.11_r9.4.1_hac_prom/basecalls.fastq.gz |

**Supplementary Table 2. Baseline assemblies used for the example ntLink runs listed in Table 1.**

| Species                       | Sequencing reads used for baseline assembly    | Assembler used for baseline assembly | Baseline assembly parameters                                                                  |
|-------------------------------|------------------------------------------------|--------------------------------------|-----------------------------------------------------------------------------------------------|
| <i>Caenorhabditis elegans</i> | Long reads (SRR10028109)                       | Flye (v2.9.1)                        | --nano-raw SRR10028109.fastq -g100m -t48                                                      |
| <i>Oryza sativa</i>           | Long reads (SRR10589512- SRR10589711)          | GoldRush (v1.0.0)<br>goldtigs*       | G=373e6 P=10 a=1 m=20000 polisher_mapper=minimap2 span=2 dist=500 t=48 polisher=goldrush-edit |
| <i>Solanum lycopersicum</i>   | Long reads (ERR6668574, subsampled to 72-fold) | GoldRush (v1.0.0)<br>goldtigs*       | G=824e6 P=15 a=1 m=20000 polisher_mapper=minimap2 span=2 dist=500 t=48 polisher=goldrush-edit |
| <i>Homo sapiens</i>           | Short reads (SRR11321732)                      | ABYSS (v2.2.3)                       | j=48 k=112 kc=3 B=150G l=40 s=1000 v=-v q=15 H=4 S=1000-10000 N=9 N=5-20 pelib1_de=-n5        |

\*GoldRush goldtigs are the polished, corrected golden path sequences generated from the GoldRush *de novo* genome assembler.
